# Supplementary material
Source: PubMed Central journal article supplement (PMC5889760)
Supplement: NIHMS939135-supplement-Supp_info.pdf [file NIHMS939135-supplement-Supp_info.pdf]

# Supplementary Material for “Variable selection with group structure in competing risks quantile regression” by Kwang Woo Ahn and Soyoung Kim

December 5, 2017

## 1 Proof of Lemma 2.1

We have the following assumptions: We assume as follows:

- (a)  $\int_0^L \lambda_0^G(t) dt < \infty$  and  $P\{Y_i(t) = 1\} > 0$  for  $t \in [0, L]$ ,  $i = 1, \dots, n$ , and  $d_n^4/n \rightarrow 0$  as  $n \rightarrow \infty$ .
- (b)  $Z_{ij}$  is bounded almost surely for all  $i, j$  and  $\boldsymbol{\alpha}^T \tilde{\mathbf{Z}}$  is bounded almost surely for any  $\tilde{\mathbf{Z}}$  and  $\boldsymbol{\alpha} \in \mathcal{B}$ , where  $\mathcal{B}$  is a neighborhood  $\boldsymbol{\alpha}_0$ .
- (c) For  $d = 0, 1, 2$ , there exists a neighborhood  $\mathcal{B}$  of  $\boldsymbol{\alpha}_0$  such that  $s_G^{(d)}(\boldsymbol{\alpha}, t)$  are continuous functions and  $\sup_{t \in (0, L), \boldsymbol{\alpha} \in \mathcal{B}} \|S_G^{(d)}(\boldsymbol{\alpha}, t) - s_G^{(d)}(\boldsymbol{\alpha}, t)\| \rightarrow 0$  in probability.
- (d) The matrix  $A(\boldsymbol{\alpha}_0) = \int_0^L v_G(\boldsymbol{\alpha}_0, t) s_G^{(0)}(\boldsymbol{\alpha}_0, t) \lambda_0^G(t) dt$  is positive definite, where  $v_G(\boldsymbol{\alpha}, t) = s_G^{(2)}(\boldsymbol{\alpha}, t)/s_G^{(0)}(\boldsymbol{\alpha}, t) - e_G(\boldsymbol{\alpha}, t)^{\otimes 2}$  and  $e_G(\boldsymbol{\alpha}, t) = s_G^{(1)}(\boldsymbol{\alpha}, t)/s_G^{(0)}(\boldsymbol{\alpha}, t)$ .
- (e) For all  $\boldsymbol{\alpha} \in \mathcal{B}$ ,  $t \in [0, L]$ ,  $S_G^{(1)}(\boldsymbol{\alpha}, t) = \partial S_G^{(0)}(\boldsymbol{\alpha}, t)/\partial \boldsymbol{\alpha}$ , and  $S_G^{(2)}(\boldsymbol{\alpha}, t) = \partial^2 S_G^{(0)}(\boldsymbol{\alpha}, t)/(\partial \boldsymbol{\alpha} \partial \boldsymbol{\alpha}^T)$ , where  $S_G^{(d)}(\boldsymbol{\alpha}, t)$ ,  $d = 0, 1, 2$  are continuous functions of  $\boldsymbol{\alpha} \in \mathcal{B}$  uniformly in  $t \in [0, L]$  and are bounded on  $\mathcal{B} \times [0, L]$ , and  $s_G^{(0)}$  is bounded away from zero on  $\mathcal{B} \times [0, L]$ .

Define  $M_i^G(t) = N_i^G(t) - \int_0^t Y_i(u) e^{\boldsymbol{\alpha}_0^T \tilde{\mathbf{Z}}} d\Lambda_0^G(u)$ . Then,

$$\hat{\Lambda}_0^G(t : \boldsymbol{\alpha}_0) - \Lambda_0^G(t) = \int_0^t \frac{\sum_{i=1}^n dM_i^G(u)}{n S_G^{(0)}(\boldsymbol{\alpha}_0, u)}.$$

We have

$$\begin{aligned}
\hat{\Lambda}_0^G(t : \hat{\boldsymbol{\alpha}}) - \Lambda_0^G(t) &= \int_0^t \left\{ \frac{1}{n\mathbb{S}_G^{(0)}(\hat{\boldsymbol{\alpha}}, u)} - \frac{1}{n\mathbb{S}_G^{(0)}(\boldsymbol{\alpha}_0, u)} \right\} d \sum_{i=1}^n M_i^G(u) \\
&+ \int_0^t \left\{ \frac{1}{\mathbb{S}_G^{(0)}(\hat{\boldsymbol{\alpha}}, u)} - \frac{1}{\mathbb{S}_G^{(0)}(\boldsymbol{\alpha}_0, u)} \right\} \mathbb{S}_G^{(0)}(\boldsymbol{\alpha}_0, u) d\Lambda_0^G(u) \\
&+ \int_0^t \frac{1}{n\mathbb{S}_G^{(0)}(\boldsymbol{\alpha}_0, u)} d \sum_{i=1}^n M_i^G(u).
\end{aligned} \tag{1}$$

Let  $\text{var}\{M_i^G(t)\} = \int_0^t s_G^{(0)}(\boldsymbol{\alpha}_0, u) d\Lambda_0^G(u)$  be  $\sigma^2(\boldsymbol{\alpha}_0, t)$ . Then, by the proof of Lemma 5 of Ni et al. [1],  $n^{-1/2} \sum_{i=1}^n M_i^G(t)/\sigma(\boldsymbol{\alpha}_0, t)$  converges weakly to a tight zero mean Gaussian process with continuous sample paths. In addition,  $\sigma(\boldsymbol{\alpha}_0, t)$  is bounded and bounded away from 0 due to Conditions (a), (b) and (e). Similarly to Theorem 1 of Ni et al. [1], using Conditions (a) to (e) we can show  $\|\hat{\boldsymbol{\alpha}} - \boldsymbol{\alpha}_0\| = O_p(\sqrt{d_n/n})$ . Then, by Taylor expansion, Conditions (c) and (e), Lemma 1 of Lin [2], the first term of (1)  $\times \sqrt{n/d_n}$  is

$$\begin{aligned}
&\sqrt{n/d_n} \int_0^t \left\{ \frac{1}{n\mathbb{S}_G^{(0)}(\hat{\boldsymbol{\alpha}}, u)} - \frac{1}{n\mathbb{S}_G^{(0)}(\boldsymbol{\alpha}_0, u)} \right\} d \sum_{i=1}^n M_i^G(u) \\
&= \frac{1}{\sqrt{d_n}} \int_0^t \left\{ \frac{1}{\mathbb{S}_G^{(0)}(\hat{\boldsymbol{\alpha}}, u)} - \frac{1}{\mathbb{S}_G^{(0)}(\boldsymbol{\alpha}_0, u)} \right\} \sigma(\boldsymbol{\alpha}_0, t) d \frac{\sum_{i=1}^n M_i^G(u)}{\sqrt{n}\sigma(\boldsymbol{\alpha}_0, t)} \\
&= \frac{1}{\sqrt{d_n}} \int_0^t \left\{ -\frac{\mathbb{S}_G^{(1)}(\boldsymbol{\alpha}_*, u)}{\mathbb{S}_G^{(0)}(\boldsymbol{\alpha}_*, u)^2} (\hat{\boldsymbol{\alpha}} - \boldsymbol{\alpha}_0) \right\} \sigma(\boldsymbol{\alpha}_0, t) d \frac{\sum_{i=1}^n M_i^G(u)}{\sqrt{n}\sigma(\boldsymbol{\alpha}_0, t)} \\
&= O_p\left(\frac{1}{\sqrt{n}}\right) = o_p(1),
\end{aligned}$$

where  $\boldsymbol{\alpha}_*$  lies between  $\hat{\boldsymbol{\alpha}}$  and  $\boldsymbol{\alpha}_0$ , which holds uniformly in  $t$ . This shows the first term of (1) is  $o_p(\sqrt{d_n/n})$  uniformly in  $t$ . The second term of (1)  $\times \sqrt{n/d_n}$  converges to  $-\sqrt{n/d_n} \int_0^t \{e(\boldsymbol{\alpha}_0, u) d\Lambda_0^G(u)\}^T (\hat{\boldsymbol{\alpha}} - \boldsymbol{\alpha}_0)$  in probability by Taylor expansion and Conditions (a), (c), and (e). Because of  $\|\hat{\boldsymbol{\alpha}} - \boldsymbol{\alpha}_0\| = O_p(\sqrt{d_n/n})$  and the boundedness of  $\Lambda_0^G(t)$  and  $e(\boldsymbol{\alpha}_0, t)$ , the second term of (1) is  $O_p(\sqrt{d_n/n})$  uniformly in  $t$ . The third term of (1)  $\times \sqrt{n/d_n}$  converges to

$$\frac{1}{\sqrt{d_n}} \int_0^t \frac{1}{s_G^{(0)}(\boldsymbol{\alpha}_0, u)} \sigma(\boldsymbol{\alpha}_0, t) d \frac{\sum_{i=1}^n M_i^G(u)}{\sqrt{n}\sigma(\boldsymbol{\alpha}_0, t)}$$

in probability by Condition (c). Because  $s_G^{(0)}(\boldsymbol{\alpha}_0, u)$  and  $\sigma(\boldsymbol{\alpha}_0, t)$  are bounded, and bounded away from 0, the third term of (1)  $\times \sqrt{n/d_n}$  is  $O_p(1/\sqrt{d_n}) = o_p(1)$  uniformly in  $t$  and thus the third term of (1) is  $o_p(\sqrt{d_n/n})$  uniformly in  $t$ . Therefore,  $\sup_t |\hat{\Lambda}_0^G(t : \hat{\boldsymbol{\alpha}}) - \Lambda_0^G(t)| = O_p(\sqrt{d_n/n})$ . By Taylor expansion and the consistency of  $\hat{\Lambda}_0^G(t : \hat{\boldsymbol{\alpha}})$ ,  $\sqrt{n/d_n} \{\hat{G}(t|\tilde{\mathbf{Z}}) - G(t|\tilde{\mathbf{Z}})\}$  is asymptotically

equivalent to

$$\begin{aligned}
& -\sqrt{n/d_n}G(t|\tilde{\mathbf{Z}})\{\hat{\Lambda}_0^G(t:\hat{\boldsymbol{\alpha}})\exp(\hat{\boldsymbol{\alpha}}^T\tilde{\mathbf{Z}})-\Lambda_0^G(t)\exp(\boldsymbol{\alpha}_0^T\tilde{\mathbf{Z}})\} \\
& = -\sqrt{n/d_n}G(t|\tilde{\mathbf{Z}})[\{\hat{\Lambda}_0^G(t:\hat{\boldsymbol{\alpha}})\exp(\hat{\boldsymbol{\alpha}}^T\tilde{\mathbf{Z}})-\hat{\Lambda}_0^G(t:\hat{\boldsymbol{\alpha}})\exp(\boldsymbol{\alpha}_0^T\tilde{\mathbf{Z}})\} \\
& \quad + \{\hat{\Lambda}_0^G(t:\hat{\boldsymbol{\alpha}})\exp(\boldsymbol{\alpha}_0^T\tilde{\mathbf{Z}})-\Lambda_0^G(t)\exp(\boldsymbol{\alpha}_0^T\tilde{\mathbf{Z}})\}] \\
& = -\sqrt{n/d_n}G(t|\tilde{\mathbf{Z}})[\hat{\Lambda}_0^G(t:\hat{\boldsymbol{\alpha}})\exp(\boldsymbol{\alpha}_*^T\tilde{\mathbf{Z}})\tilde{\mathbf{Z}}^T(\hat{\boldsymbol{\alpha}}-\boldsymbol{\alpha}_0)+\exp(\boldsymbol{\alpha}_0^T\tilde{\mathbf{Z}})\{\hat{\Lambda}_0^G(t:\hat{\boldsymbol{\alpha}})-\Lambda_0^G(t)\}],
\end{aligned}$$

where  $\boldsymbol{\alpha}_*$  lies between  $\boldsymbol{\alpha}_0$  and  $\hat{\boldsymbol{\alpha}}$ . Because of  $\sup_t |\hat{\Lambda}_0^G(t:\hat{\boldsymbol{\alpha}})-\Lambda_0^G(t)| = O_p(\sqrt{d_n/n})$ ,  $\|\hat{\boldsymbol{\alpha}}-\boldsymbol{\alpha}_0\| = O_p(\sqrt{d_n/n})$ , and Conditions (a) & (b), we have  $\sup_t |\hat{G}(t|\tilde{\mathbf{Z}})-G(t|\tilde{\mathbf{Z}})| = O_p(\sqrt{d_n/n})$ .

## 2 Proofs of Lemma 2.3 and Theorem 2.5

Let  $\mathbf{S}_n^G(\mathbf{b}, \tau) = n^{-1/2} \sum_{i=1}^n \mathbf{Z}_i [I\{X_i \leq g(X_i^T \mathbf{b})\} I(\delta_i = 1) / G(X_i | \tilde{\mathbf{Z}}) - \tau]$ . Because of (C1), we have  $\sup_{t < \omega} |\hat{G}(t|\tilde{\mathbf{Z}}) - G(t|\tilde{\mathbf{Z}})| = o_p(n^{-1/2+q}d_n^{1/2})$  for any  $q > 0$ . Consider

$$\begin{aligned}
& n^{-1/2}\mathbf{S}_n(\mathbf{b}, \tau) - n^{-1/2}\mathbf{S}_n^G(\mathbf{b}, \tau) \\
& = n^{-1} \left( \sum_{i=1}^n \mathbf{Z}_i \left[ \frac{I\{X_i \leq g(\mathbf{Z}_i^T \mathbf{b})\} I(\delta_i = 1)}{\hat{G}(X_i | \tilde{\mathbf{Z}}_i)} - \tau \right] - \sum_{i=1}^n \mathbf{Z}_i \left[ \frac{I\{X_i \leq g(\mathbf{Z}_i^T \mathbf{b})\} I(\delta_i = 1)}{G(X_i | \tilde{\mathbf{Z}}_i)} - \tau \right] \right) \\
& = n^{-1} \sum_{i=1}^n \mathbf{Z}_i \left[ \frac{I\{X_i \leq g(\mathbf{Z}_i^T \mathbf{b})\} I(\delta_i = 1) \{G(X_i | \tilde{\mathbf{Z}}_i) - \hat{G}(X_i | \tilde{\mathbf{Z}}_i)\}}{\hat{G}(X_i | \tilde{\mathbf{Z}}_i) G(X_i | \tilde{\mathbf{Z}}_i)} \right].
\end{aligned}$$

Because of the boundedness of the  $d_n$  elements of  $\mathbf{Z}_i$ , (C1), and Lemma 2.1, for  $0 < q \leq 1/8$  we have

$$\sup_{\mathbf{b}} \|n^{-1/2}\mathbf{S}_n(\mathbf{b}, \tau) - n^{-1/2}\mathbf{S}_n^G(\mathbf{b}, \tau)\| = o_p(n^{-1/2+q}d_n^{1/2}d_n) = o_p(1). \quad (2)$$

By Chebyshev's inequality, (C2), and (C3) for any  $\epsilon$ ,

$$\begin{aligned}
& P(\|n^{-1/2}\mathbf{S}_n^G(\mathbf{b}, \tau) - E\{n^{-1/2}\tilde{\mathbf{S}}_n(\mathbf{b}, \tau)\}\| \geq \epsilon) \\
& \leq \frac{1}{\epsilon^2} E\|n^{-1/2}\mathbf{S}_n^G(\mathbf{b}, \tau) - E\{n^{-1/2}\tilde{\mathbf{S}}_n(\mathbf{b}, \tau)\}\|^2 \\
& = O\left(\frac{d_n}{n\epsilon^2}\right) = o(1),
\end{aligned}$$

which holds uniformly in  $\mathbf{b} \in \mathcal{B}(\rho_0)$ . Similarly, by Chebyshev's inequality, (C3), (C4), (C6), and (C7), for any  $\epsilon$ ,

$$P(\|n^{-1/2} \nabla \tilde{\mathbf{S}}_n(\mathbf{b}, \tau) - \mathbf{H}(\mathbf{b})\| \geq \frac{\epsilon}{d_n}) \leq O\left(\frac{d_n^4}{n\epsilon^2}\right) = o(1), \quad (3)$$

which holds uniformly in  $\mathbf{b} \in \mathcal{B}(\rho_0)$ .

For  $0 < q \leq 1/8$ , by (2) and (C2) we have

$$\begin{aligned}
\frac{1}{n}U_n(\mathbf{b}, \tau) &= \frac{1}{n} \left\{ \sum_{i=1}^n I(\delta_i = 1) \left| \frac{g^{-1}(X_i) - \mathbf{b}^T \mathbf{Z}_i}{\hat{G}(X_i | \tilde{\mathbf{Z}})} \right| \right. \\
&\quad \left. + \left| M - \mathbf{b}^T \sum_{i=1}^n \frac{-\mathbf{Z}_i I(\delta_i = 1)}{\hat{G}(X_i | \tilde{\mathbf{Z}})} \right| + \left| M - \mathbf{b}^T \sum_{i=1}^n 2\mathbf{Z}_i \tau \right| \right\} \\
&= \frac{1}{n} \left\{ \sum_{i=1}^n I(\delta_i = 1) \left| \frac{g^{-1}(X_i) - \mathbf{b}^T \mathbf{Z}_i}{G(X_i | \tilde{\mathbf{Z}})} \right| + \left| M - \mathbf{b}^T \sum_{i=1}^n \frac{-\mathbf{Z}_i I(\delta_i = 1)}{G(X_i | \tilde{\mathbf{Z}})} \right| \right. \\
&\quad \left. + \left| M - \mathbf{b}^T \sum_{i=1}^n 2\mathbf{Z}_i \tau \right| \right\} + o_p(n^{-1/2+q} d_n^{3/2}),
\end{aligned}$$

where  $o_p(n^{-1/2+q} d_n^{3/2}) = o_p(1)$ . Let

$$\begin{aligned}
\tilde{U}_n(\mathbf{b}, \tau) &= \sum_{i=1}^n I(\delta_i = 1) \left| \frac{g^{-1}(X_i) - \mathbf{b}^T \mathbf{Z}_i}{G(X_i | \tilde{\mathbf{Z}})} \right| + \left| M - \mathbf{b}^T \sum_{i=1}^n \frac{-\mathbf{Z}_i I(\delta_i = 1)}{G(X_i | \tilde{\mathbf{Z}})} \right| \\
&\quad + \left| M - \mathbf{b}^T \sum_{i=1}^n 2\mathbf{Z}_i \tau \right|.
\end{aligned}$$

First of all, we show consistency of  $\hat{\beta}(\tau)$ . It is sufficient to show that for any  $\epsilon > 0$ , there exists a large constant  $C$  such that

$$P \left[ \inf_{\|\mathbf{u}\|=1} W_n\{\boldsymbol{\beta}_0(\tau) + C\alpha_n \mathbf{u}, \tau\} > W_n\{\boldsymbol{\beta}_0(\tau), \tau\} \right] > 1 - \epsilon,$$

where  $\|\mathbf{u}\| = 1$ . Let  $\alpha_n = \sqrt{d_n/n}$ . We have

$$\begin{aligned}
&\frac{1}{n} [W_n\{\boldsymbol{\beta}_0(\tau) + C\alpha_n \mathbf{u}, \tau\} - W_n\{\boldsymbol{\beta}_0(\tau), \tau\}] \\
&= \frac{1}{n} [U_n\{\boldsymbol{\beta}_0(\tau) + C\alpha_n \mathbf{u}, \tau\} - U_n\{\boldsymbol{\beta}_0(\tau), \tau\}] + D_n,
\end{aligned}$$

where

$$D_n = \frac{\lambda_n}{n} \sum_{k=1}^K c_k \left( \sum_{j \in A_k} \frac{|\beta_{j,0}(\tau) + C\alpha_n u_j|}{|\tilde{\beta}_j(\tau)|^\nu} \right)^\gamma - \frac{\lambda_n}{n} \sum_{k=1}^K c_k \left( \sum_{j \in A_k} \frac{|\beta_{j,0}(\tau)|}{|\tilde{\beta}_j(\tau)|^\nu} \right)^\gamma.$$

By Taylor expansion, for  $0 < q \leq 1/4$  we have

$$\begin{aligned}
&\frac{1}{n} [U_n\{\boldsymbol{\beta}_0(\tau) + C\alpha_n \mathbf{u}, \tau\} - U_n\{\boldsymbol{\beta}_0(\tau), \tau\}] \\
&= \frac{1}{n} C\alpha_n \mathbf{u}^T \nabla \tilde{U}_n\{\boldsymbol{\beta}_0(\tau), \tau\} + \frac{C^2}{2n} \alpha_n^2 \mathbf{u}^T \nabla^2 \tilde{U}_n\{\boldsymbol{\beta}^*(\tau), \tau\} \mathbf{u} + o_p(n^{-1/2+q} d_n). \\
&= R_1 + R_2 + o_p(1),
\end{aligned}$$

where  $\beta^*(\tau)$  is between  $\beta_0(\tau) + \alpha_n \mathbf{u}$  and  $\beta_0(\tau)$ . By the Cauchy-Schwartz inequality, (C1), and (C2),

$$R_1 = \frac{1}{n} C \alpha_n \mathbf{u}^T \nabla \tilde{U}_n\{\beta_0(\tau), \tau\} = \frac{1}{n} C \alpha_n \|\mathbf{u}\| \|\nabla \tilde{U}_n\{\beta_0(\tau), \tau\}\| = C O_p(\alpha_n^2) \|\mathbf{u}\|.$$

By  $\nabla \tilde{U}_n\{\mathbf{b}, \tau\} = \mathbf{S}_n^G\{\mathbf{b}, \tau\} = \tilde{\mathbf{S}}_n\{\mathbf{b}, \tau\} + o_p(1)$ , (3), and (C4),  $R_2 = C^2 \alpha_n^2 \mathbf{u}^T \nabla^2 \tilde{U}\{\beta_0(\tau), \tau\} \mathbf{u} \{1 + o_p(1)\}$ . Therefore,  $R_1$  is of order  $C \alpha_n^2$  and  $R_2$  is of order  $C^2 \alpha_n^2$ . If we choose sufficiently large  $C$ ,  $R_2 > 0$  dominates  $R_1$ , which shows Lemma 2.3.

Next,  $D_n$  can be written as:

$$\begin{aligned} D_n &= \frac{\lambda_n}{n} \sum_{k=1}^K c_k \left( \sum_{j \in A_k} \frac{|\beta_{j,0}(\tau) + C \alpha_n u_j|}{|\tilde{\beta}_j(\tau)|^\nu} \right)^\gamma - \frac{\lambda_n}{n} \sum_{k=1}^K c_k \left( \sum_{j \in A_k} \frac{|\beta_{j,0}(\tau)|}{|\tilde{\beta}_j(\tau)|^\nu} \right)^\gamma \\ &= \left\{ \frac{\lambda_n}{n} \sum_{k=1}^{K_1} c_k \left( \sum_{j \in A_k} \frac{|\beta_{j,0}(\tau) + C \alpha_n u_j|}{|\tilde{\beta}_j(\tau)|^\nu} \right)^\gamma - \frac{\lambda_n}{n} \sum_{k=1}^{K_1} c_k \left( \sum_{j \in A_k \cap B_1} \frac{|\beta_{j,0}(\tau)|}{|\tilde{\beta}_j(\tau)|^\nu} \right)^\gamma \right\} \\ &\quad + \frac{\lambda_n}{n} \sum_{k=K_1+1}^K c_k \left( \sum_{j \in A_k} \frac{|\beta_{j,0}(\tau) + C \alpha_n u_j|}{|\tilde{\beta}_j(\tau)|^\nu} \right)^\gamma \\ &= I_1 + I_2. \end{aligned}$$

Consider  $I_1$  first. We consider 2 cases: Case i) when  $\beta_{j,0}(\tau) \neq 0$  for all  $j \in A_k$  for all  $k \in \{1, 2, \dots, K_1\}$ ; and Case ii) there is at least one  $\beta_{j,0}(\tau)$  such that  $\beta_{j,0}(\tau) = 0$  for some  $j \in A_k$  for some  $k \in \{1, 2, \dots, K_1\}$ .

For Case i), we assume that  $\beta_{j,0}(\tau) \neq 0$  for all  $j \in A_k$  for all  $k \in \{1, 2, \dots, K_1\}$ . Since  $b^\gamma - a^\gamma \leq 2(b-a)b^{\gamma-1}$  for  $0 < a \leq b$  and  $|\beta_{j,0}(\tau)| = O_p\{(d_n/n)^{\nu_1/2}\}$  with  $0 < \nu_1 < 1$  as in (C8b) for  $j \in B_1$  and any  $\tau \in [\tau_L, \tau_U]$ , we have that for sufficiently large  $n$  such that  $C \alpha_n \leq |\beta_{j,0}(\tau)|$  for all  $j \in A_k$  and any  $\tau \in [\tau_L, \tau_U]$ ,

$$\begin{aligned} &\frac{\lambda_n}{n} \sum_{k=1}^{K_1} c_k \left( \sum_{j \in A_k} \frac{|\beta_{j,0}(\tau) + C \alpha_n u_j|}{|\tilde{\beta}_j(\tau)|^\nu} \right)^\gamma - \frac{\lambda_n}{n} \sum_{k=1}^{K_1} c_k \left( \sum_{j \in A_k} \frac{|\beta_{j,0}(\tau)|}{|\tilde{\beta}_j(\tau)|^\nu} \right)^\gamma \\ &\leq \frac{\lambda_n}{n} \sum_{k=1}^{K_1} c_k \left( \sum_{j \in A_k} \frac{|\beta_{j,0}(\tau)| + C |u_j| \alpha_n}{|\tilde{\beta}_j(\tau)|^\nu} \right)^\gamma - \frac{\lambda_n}{n} \sum_{k=1}^{K_1} c_k \left( \sum_{j \in A_k} \frac{|\beta_{j,0}(\tau)|}{|\tilde{\beta}_j(\tau)|^\nu} \right)^\gamma \\ &\leq 2 \frac{\lambda_n}{n} \sum_{k=1}^{K_1} c_k \left\{ \left( \sum_{j \in A_k} \frac{|\beta_{j,0}(\tau)|}{|\tilde{\beta}_j(\tau)|^\nu} \right)^{\gamma-1} \sum_{j \in A_k} \frac{C |u_j| \alpha_n}{|\tilde{\beta}_j(\tau)|^\nu} \right\} \tag{4} \\ &\leq 2 \frac{\lambda_n}{n} \sum_{k=1}^{K_1} c_k \left\{ \left( \sum_{j \in A_k} \frac{2|\beta_{j,0}(\tau)|}{|\tilde{\beta}_j(\tau)|^\nu} \right)^{\gamma-1} \sum_{j \in A_k} \frac{C |u_j| \alpha_n}{|\tilde{\beta}_j(\tau)|^\nu} \right\} \\ &\leq 2 \alpha_n^2 \lambda_n (d_n n)^{-1/2} \sum_{k=1}^{K_1} c_k \left\{ \left( \sum_{j \in A_k} \frac{2|\beta_{j,0}(\tau)|}{|\tilde{\beta}_j(\tau)|^\nu} \right)^{\gamma-1} \sum_{j \in A_k} \frac{C |u_j|}{|\tilde{\beta}_j(\tau)|^\nu} \right\}. \end{aligned}$$

Using  $|\tilde{\beta}_j(\tau)|^\nu \rightarrow_p |\beta_{j,0}(\tau)|^\nu \neq 0$  for  $j \in B_1$ , (C8b) and (C9b), this term is dominated by  $R_2 > 0$ , where  $\rightarrow_p$  indicates convergence in probability.

For Case ii), assume that there are  $\beta_{j,0}(\tau)$ 's such that  $\beta_{j,0}(\tau) = 0$  for some  $j \in A_k$  for some  $k \in \{1, 2, \dots, K_1\}$ . Consider

$$\begin{aligned}
& \sum_{j \in A_k} \frac{|\beta_{j,0}(\tau) + C\alpha_n u_j|}{|\tilde{\beta}_j(\tau)|^\nu} - \sum_{j \in A_k \cap B_1} \frac{|\beta_{j,0}(\tau)|}{|\tilde{\beta}_j(\tau)|^\nu} \\
&= \left( \sum_{j \in A_k \cap B_1} \frac{|\beta_{j,0}(\tau) + C\alpha_n u_j|}{|\tilde{\beta}_j(\tau)|^\nu} - \sum_{j \in A_k \cap B_1} \frac{|\beta_{j,0}(\tau)|}{|\tilde{\beta}_j(\tau)|^\nu} \right) + \sum_{j \in A_k \cap B_2} \frac{|\beta_{j,0}(\tau) + C\alpha_n u_j|}{|\tilde{\beta}_j(\tau)|^\nu} \\
&= \left( \sum_{j \in A_k \cap B_1} \frac{|\beta_{j,0}(\tau) + C\alpha_n u_j|}{|\tilde{\beta}_j(\tau)|^\nu} - \sum_{j \in A_k \cap B_1} \frac{|\beta_{j,0}(\tau)|}{|\tilde{\beta}_j(\tau)|^\nu} \right) + \sum_{j \in A_k \cap B_2} \frac{C\alpha_n |u_j|}{|\tilde{\beta}_j(\tau)|^\nu} \\
&= I_{11} + I_{12}.
\end{aligned}$$

We have

$$\begin{aligned}
|I_{11}| &\leq \sum_{j \in A_k \cap B_1} \frac{C\alpha_n |u_j|}{|\tilde{\beta}_j(\tau)|^\nu}, \\
|I_{12}| &= \sum_{j \in A_k \cap B_2} \frac{C\alpha_n^{1-\nu} |u_j|}{|\sqrt{n/d_n} \tilde{\beta}_j(\tau)|^\nu}.
\end{aligned} \tag{5}$$

Since  $\tilde{\beta}_j(\tau)$  converges in probability to non-zero  $\beta_{j,0}(\tau) = O_p\{(d_n/n)^{\nu_1/2}\}$  for  $j \in B_1$  and  $\max_k |A_k \cap B_1| = O\{(n/d_n)^{\nu_2/2}\}$ ,  $|I_{11}| \leq O_p(\alpha_n^{1-\nu\nu_1-\nu_2}) = o_p(\alpha_n^{1-\nu})$  because  $\nu\nu_1 + \nu_2 < \nu$  as in (C8b). On the other hand, because  $\sqrt{n/d_n} \tilde{\beta}_j(\tau) = O_p(1)$  for  $j \in B_2$ ,  $|I_{12}|$  is at least  $O_p(\alpha_n^{1-\nu})$ . Thus,  $I_{12} > 0$  dominates  $I_{11}$  as  $n \rightarrow \infty$ . Therefore, for sufficiently large  $n$ ,

$$\sum_{j \in A_k} \frac{|\beta_{j,0}(\tau) + C\alpha_n u_j|}{|\tilde{\beta}_j(\tau)|^\nu} > \sum_{j \in A_k \cap B_1} \frac{|\beta_{j,0}(\tau)|}{|\tilde{\beta}_j(\tau)|^\nu}.$$

Then, due to  $\gamma b^{\gamma-1}(b-a) \leq b^\gamma - a^\gamma$  for  $0 \leq a \leq b$ , for sufficiently large  $n$  we have

$$\begin{aligned}
& \frac{\lambda_n}{n} \left( \sum_{j \in A_k} \frac{|\beta_{j,0}(\tau) + C\alpha_n u_j|}{|\tilde{\beta}_j(\tau)|^\nu} \right)^\gamma - \frac{\lambda_n}{n} \left( \sum_{j \in A_k \cap B_1} \frac{|\beta_{j,0}(\tau)|}{|\tilde{\beta}_j(\tau)|^\nu} \right)^\gamma \\
& \geq \gamma \frac{\lambda_n}{n} \left( \sum_{j \in A_k} \frac{|\beta_{j,0}(\tau) + C\alpha_n u_j|}{|\tilde{\beta}_j(\tau)|^\nu} \right)^{\gamma-1} \left( \sum_{j \in A_k} \frac{|\beta_{j,0}(\tau) + C\alpha_n u_j|}{|\tilde{\beta}_j(\tau)|^\nu} - \sum_{j \in A_k \cap B_1} \frac{|\beta_{j,0}(\tau)|}{|\tilde{\beta}_j(\tau)|^\nu} \right) \\
& = \gamma \frac{\lambda_n}{n} \left( \sum_{j \in A_k} \frac{|\beta_{j,0}(\tau) + C\alpha_n u_j|}{|\tilde{\beta}_j(\tau)|^\nu} \right)^{\gamma-1} \left( \sum_{j \in A_k \cap B_1} \frac{|\beta_{j,0}(\tau) + C\alpha_n u_j| - |\beta_{j,0}(\tau)|}{|\tilde{\beta}_j(\tau)|^\nu} \right. \\
& \quad \left. + \sum_{j \in A_k \cap B_2} \frac{|\beta_{j,0}(\tau) + C\alpha_n u_j|}{|\tilde{\beta}_j(\tau)|^\nu} \right) \\
& = \gamma \frac{\lambda_n}{n} \left( \sum_{j \in A_k} \frac{|\beta_{j,0}(\tau) + C\alpha_n u_j|}{|\tilde{\beta}_j(\tau)|^\nu} \right)^{\gamma-1} \sum_{j \in A_k \cap B_1} \frac{|\beta_{j,0}(\tau) + C\alpha_n u_j| - |\beta_{j,0}(\tau)|}{|\tilde{\beta}_j(\tau)|^\nu} \\
& \quad + \gamma \frac{\lambda_n}{n} \left( \sum_{j \in A_k} \frac{|\beta_{j,0}(\tau) + C\alpha_n u_j|}{|\tilde{\beta}_j(\tau)|^\nu} \right)^{\gamma-1} \sum_{j \in A_k \cap B_2} \frac{|\beta_{j,0}(\tau) + C\alpha_n u_j|}{|\tilde{\beta}_j(\tau)|^\nu} \\
& = I_{13} + I_{14}.
\end{aligned}$$

By similar argument to (5),  $I_{14}$  dominates  $I_{13}$ . Consider  $I_{14}$ :

$$\begin{aligned}
& \gamma \frac{\lambda_n}{n} \left( \sum_{j \in A_k} \frac{|\beta_{j,0}(\tau) + C\alpha_n u_j|}{|\tilde{\beta}_j(\tau)|^\nu} \right)^{\gamma-1} \sum_{j \in A_k \cap B_2} \frac{|\beta_{j,0}(\tau) + C\alpha_n u_j|}{|\tilde{\beta}_j(\tau)|^\nu} \\
& = \gamma \frac{\lambda_n}{n} \left( \frac{n}{d_n} \right)^{\nu/2} \left( \sum_{j \in A_k} \frac{|\beta_{j,0}(\tau) + C\alpha_n u_j|}{|\tilde{\beta}_j(\tau)|^\nu} \right)^{\gamma-1} \sum_{j \in A_k \cap B_2} \frac{C\alpha_n |u_j|}{|\sqrt{n/d_n} \tilde{\beta}_j(\tau)|^\nu} \\
& = \gamma \frac{\lambda_n}{n} \left( \frac{n}{d_n} \right)^{\nu/2} \left( \frac{d_n}{n} \right)^{1/2} \left( \sum_{j \in A_k} \frac{|\beta_{j,0}(\tau) + C\alpha_n u_j|}{|\tilde{\beta}_j(\tau)|^\nu} \right)^{\gamma-1} \sum_{j \in A_k \cap B_2} \frac{C|u_j|}{|\sqrt{n/d_n} \tilde{\beta}_j(\tau)|^\nu} \\
& = \gamma \alpha_n^2 \lambda_n n^{(\nu-1)/2} d_n^{-(\nu+1)/2} \left( \sum_{j \in A_k} \frac{|\beta_{j,0}(\tau) + C\alpha_n u_j|}{|\tilde{\beta}_j(\tau)|^\nu} \right)^{\gamma-1} \sum_{j \in A_k \cap B_2} \frac{C|u_j|}{|\sqrt{n/d_n} \tilde{\beta}_j(\tau)|^\nu},
\end{aligned} \tag{6}$$

where  $\sqrt{n/d_n} \tilde{\beta}_j(\tau) = O_p(1)$ . Because  $\lambda_n n^{(\nu-1)/2} d_n^{-(1+\nu)/2} \rightarrow \infty$  by (C9b),  $I_{14} > 0$  dominates  $R_1$  and  $R_2$ . Hence, by (4) and (6), if there exists at least one  $\beta_{j,0}(\tau)$  equal to 0,  $I_1 > 0$  dominates  $R_1$  and  $R_2$  for sufficiently large  $n$ .

Next, consider  $I_2$ :

$$\begin{aligned}
& \frac{\lambda_n}{n} \sum_{k=K_1+1}^K c_k \left( \sum_{j \in A_k} \frac{|\beta_{j,0}(\tau) + C\alpha_n u_j|}{|\tilde{\beta}_j(\tau)|^\nu} \right)^\gamma \\
&= \frac{\lambda_n}{n} \left( \frac{n}{d_n} \right)^{\nu\gamma/2} \sum_{k=K_1+1}^K c_k \left( \sum_{j \in A_k \cap B_2} \frac{C\alpha_n |u_j|}{(\sqrt{n/d_n} |\tilde{\beta}_j(\tau)|)^\nu} \right)^\gamma \\
&= \alpha^2 \lambda_n n^{\gamma(\nu-1)/2} d_n^{-1+\gamma(1-\nu)/2} \sum_{k=K_1+1}^K c_k \left( \sum_{j \in A_k \cap B_2} \frac{C|u_j|}{(\sqrt{n/d_n} |\tilde{\beta}_j(\tau)|)^\nu} \right)^\gamma.
\end{aligned} \tag{7}$$

Because  $\lambda_n n^{\gamma(\nu-1)/2} d_n^{-1+\gamma(1-\nu)/2} \rightarrow \infty$  by (C9b),  $I_2 > 0$  dominates  $R_1$  and  $R_2$ .

Therefore, by (4), (6), and (7), for sufficiently large  $n$ ,

$$W_n\{\boldsymbol{\beta}_0(\tau) + C\alpha_n \mathbf{u}, \tau\} - W_n\{\boldsymbol{\beta}_0(\tau), \tau\} > 0$$

which proves (1) of Theorem 2.4.

Next, we show variable selection consistency. Let  $\boldsymbol{\beta}(\tau) = \boldsymbol{\beta}_0(\tau) + C\alpha_n \mathbf{u}$ . Then, we have

$$\begin{aligned}
& \frac{1}{n} W_n[\{\boldsymbol{\beta}_{B_1}(\tau)^T, \mathbf{0}^T\}^T, \tau] - \frac{1}{n} W_n[\{\boldsymbol{\beta}_{B_1}(\tau)^T, \boldsymbol{\beta}_{B_2}(\tau)^T\}^T, \tau] \\
&= \frac{1}{n} \left( W_n[\{\boldsymbol{\beta}_{B_1}(\tau)^T, \mathbf{0}^T\}^T, \tau] - W_n[\{\boldsymbol{\beta}_{B_{1,0}}(\tau)^T, \mathbf{0}^T\}^T, \tau] \right) \\
&\quad - \frac{1}{n} \left( W_n[\{\boldsymbol{\beta}_{B_1}(\tau)^T, \boldsymbol{\beta}_{B_2}(\tau)^T\}^T, \tau] - W_n[\{\boldsymbol{\beta}_{B_{1,0}}(\tau)^T, \mathbf{0}^T\}^T, \tau] \right) \\
&= \frac{1}{n} \left( U_n[\{\boldsymbol{\beta}_{B_1}(\tau)^T, \mathbf{0}^T\}^T, \tau] - U_n[\{\boldsymbol{\beta}_{B_{1,0}}(\tau)^T, \mathbf{0}^T\}^T, \tau] \right) \\
&\quad - \frac{1}{n} \left( U_n[\{\boldsymbol{\beta}_{B_1}(\tau)^T, \boldsymbol{\beta}_{B_2}(\tau)^T\}^T, \tau] - U_n[\{\boldsymbol{\beta}_{B_{1,0}}(\tau)^T, \mathbf{0}^T\}^T, \tau] \right) \\
&\quad + \left\{ \frac{\lambda_n}{n} \sum_{k=1}^{K_1} c_k \left( \sum_{j \in A_k \cap B_1} \frac{|\beta_{j,0}(\tau) + C\alpha_n u_j|}{|\tilde{\beta}_j(\tau)|^\nu} \right)^\gamma - \frac{\lambda_n}{n} \sum_{k=1}^K c_k \left( \sum_{j \in A_k} \frac{|\beta_{j,0}(\tau) + C\alpha_n u_j|}{|\tilde{\beta}_j(\tau)|^\nu} \right)^\gamma \right\} \\
&= J_1 - J_2 + J_3.
\end{aligned}$$

It suffices to show that for sufficiently large  $n$ ,

$$\frac{1}{n} W_n[\{\boldsymbol{\beta}_{B_1}(\tau)^T, \mathbf{0}^T\}^T, \tau] - \frac{1}{n} W_n[\{\boldsymbol{\beta}_{B_1}(\tau)^T, \boldsymbol{\beta}_{B_2}(\tau)^T\}^T, \tau] < 0.$$

As in the proof of consistency of the adaptive group bridge estimator,  $J_1$  and  $J_2$  are of order  $C^2 \alpha_n^2$ .



Consider  $J_3$ :

$$\begin{aligned}
& \frac{\lambda_n}{n} \sum_{k=1}^{K_1} c_k \left( \sum_{j \in A_k \cap B_1} \frac{|\beta_{j,0}(\tau) + C\alpha_n u_j|}{|\tilde{\beta}_j(\tau)|^\nu} \right)^\gamma - \frac{\lambda_n}{n} \sum_{k=1}^K c_k \left( \sum_{j \in A_k} \frac{|\beta_{j,0}(\tau) + C\alpha_n u_j|}{|\tilde{\beta}_j(\tau)|^\nu} \right)^\gamma \\
&= \frac{\lambda_n}{n} \sum_{k=1}^{K_1} c_k \left( \sum_{j \in A_k \cap B_1} \frac{|\beta_{j,0}(\tau) + C\alpha_n u_j|}{|\tilde{\beta}_j(\tau)|^\nu} \right)^\gamma - \frac{\lambda_n}{n} \sum_{k=1}^{K_1} c_k \left( \sum_{j \in A_k} \frac{|\beta_{j,0}(\tau) + C\alpha_n u_j|}{|\tilde{\beta}_j(\tau)|^\nu} \right)^\gamma \\
&\quad - \frac{\lambda_n}{n} \sum_{k=K_1+1}^K c_k \left( \sum_{j \in A_k} \frac{|\beta_{j,0}(\tau) + C\alpha_n u_j|}{|\tilde{\beta}_j(\tau)|^\nu} \right)^\gamma \\
&= J_{31} - J_{32} - J_{33}
\end{aligned} \tag{8}$$

Because  $\gamma b^{\gamma-1}(b-a) \leq b^\gamma - a^\gamma$  for  $0 \leq a \leq b$ , similarly to (6) we have

$$\begin{aligned}
& J_{32} - J_{31} \\
&= \frac{\lambda_n}{n} \sum_{k=1}^{K_1} c_k \left( \sum_{j \in A_k} \frac{|\beta_{j,0}(\tau) + C\alpha_n u_j|}{|\tilde{\beta}_j(\tau)|^\nu} \right)^\gamma - \frac{\lambda_n}{n} \sum_{k=1}^{K_1} c_k \left( \sum_{j \in A_k \cap B_1} \frac{|\beta_{j,0}(\tau) + C\alpha_n u_j|}{|\tilde{\beta}_j(\tau)|^\nu} \right)^\gamma \\
&\geq \frac{\lambda_n}{n} \sum_{k=1}^{K_1} \gamma c_k \left( \sum_{j \in A_k \cap B_1} \frac{|\beta_{j,0}(\tau) + C\alpha_n u_j|}{|\tilde{\beta}_j(\tau)|^\nu} \right)^{\gamma-1} \left( \sum_{j \in A_k \cap B_2} \frac{|\beta_{j,0}(\tau) + C\alpha_n u_j|}{|\tilde{\beta}_j(\tau)|^\nu} \right) \\
&= \alpha^2 \lambda_n n^{(\nu-1)/2} d_n^{-(\nu+1)/2} \sum_{k=1}^{K_1} \gamma c_k \left( \sum_{j \in A_k \cap B_1} \frac{|\beta_{j,0}(\tau) + C\alpha_n u_j|}{|\tilde{\beta}_j(\tau)|^\nu} \right)^{\gamma-1} \\
&\quad \times \sum_{j \in A_k \cap B_2} \frac{C|u_j|}{|\sqrt{n/d_n} \tilde{\beta}_j(\tau)|^\nu}.
\end{aligned}$$

Because  $\sqrt{n/d_n} \tilde{\beta}_j(\tau) = O_p(1)$  for  $j \in B_2$  and  $\lambda_n n^{(\nu-1)/2} d_n^{-(\nu+1)/2} \rightarrow \infty$  by (C9b),  $J_{31} - J_{32} < 0$  dominates  $J_1$  and  $J_2$ . Similarly to (7),  $-J_{33} < 0$  also dominates  $J_1$  and  $J_2$ . Therefore, for sufficiently large  $n$ ,

$$\frac{1}{n} W_n[\{\boldsymbol{\beta}_{B_1}(\tau)^T, \mathbf{0}^T\}^T, \tau] - \frac{1}{n} W_n[\{\boldsymbol{\beta}_{B_1}(\tau)^T, \boldsymbol{\beta}_{B_2}(\tau)^T\}^T, \tau] < 0,$$

which shows individual variable selection consistency.

To show the asymptotics  $\hat{\boldsymbol{\beta}}_{B_1}(\tau)$ , we study the asymptotic normality of  $\tilde{\boldsymbol{\beta}}(\tau)$ , which is the solution of  $\mathbf{S}_n(\mathbf{b}, \tau) = \mathbf{0}$ , when  $d_n$  is fixed. Using (5.1) and (5.2) of He et al. [3], we have

$$\begin{aligned}
\frac{1}{\hat{G}(t|\mathbf{Z}_i)} - \frac{1}{G(t|\mathbf{Z}_i)} &= \frac{1}{nG(t|\mathbf{Z}_i)} \sum_{i=1}^n \int_0^L \left[ \mathbf{h}^T(t, 0, \mathbf{Z}_i) \mathbf{A}(\boldsymbol{\alpha}_0)^{-1} \{\mathbf{Z}_i - e_G(\boldsymbol{\alpha}_0, t)\} \right. \\
&\quad \left. + \frac{e^{\boldsymbol{\alpha}_0^T \mathbf{Z}_i} I(u \leq t)}{s_G^{(0)}(\boldsymbol{\alpha}_0, u)} \right] dM_i^G(u) + o_p(n^{-1/2}).
\end{aligned} \tag{9}$$

Using (9), similarly to Peng and Fine [4], we can show  $\mathbf{S}_n(\boldsymbol{\beta}_0(\tau), \tau)$  is asymptotically equivalent to  $n^{-1/2} \sum_{i=1}^n \eta_i(\tau)$  and  $n^{1/2} \{\tilde{\boldsymbol{\beta}}_0(\tau) - \boldsymbol{\beta}_0(\tau)\}$  is asymptotically equivalent to  $n^{-1/2} \sum_{i=1}^n \mathbf{H}\{\boldsymbol{\beta}_0(\tau)\}^{-1} \eta_i(\tau)$ . Therefore, by the multivariate central limit theorem,  $n^{1/2} \{\tilde{\boldsymbol{\beta}}_0(\tau) - \boldsymbol{\beta}_0(\tau)\}$  converges to  $N(\mathbf{0}, \mathbf{H}\{\boldsymbol{\beta}_0(\tau)\}^{-1} E\{\eta_1(\tau) \eta_1(\tau)^T\} \mathbf{H}\{\boldsymbol{\beta}_0(\tau)\}^{-1})$  in distribution for fixed  $d_n$ .

Next, we show the asymptotics of  $\hat{\boldsymbol{\beta}}_{B_1}(\tau)$ , where  $\boldsymbol{\beta}_{B_1}(\tau) = \{\beta_{j,0}(\tau) + C\alpha_n u_j; j \in B_1\}^T$ . Let  $b_i$  be the dimension of  $B_i$  for  $i = 1, 2$ . Note that Theorem 2.5 works on restricted  $\beta_j$ 's and  $Z_{i,j}$  for  $j \in B_1$ . Thus, we have

$$\|\hat{\boldsymbol{\beta}}_{B_1}(\tau) - \boldsymbol{\beta}_{B_1,0}(\tau)\| = O_p(n^{-1}), \quad \|\hat{\boldsymbol{\beta}}(\tau) - \boldsymbol{\beta}_0(\tau)\| = O_p(n^{-1}).$$

Consider  $V_{1n} = W_n\{\boldsymbol{\beta}_0(\tau) + n^{-1/2}(\mathbf{a}^T, \mathbf{0}^T)^T, \tau\} - W_n\{\boldsymbol{\beta}_0(\tau), \tau\}$ , where  $\mathbf{a} = (a_1, \dots, a_{b_1})^T$  is a  $b_1$ -dimensional vector and  $\mathbf{0}$  is a  $b_2$ -dimensional zero vector. From the consistency of  $\hat{\boldsymbol{\beta}}(\tau)$ , we have  $\hat{\boldsymbol{\beta}}(\tau) - \boldsymbol{\beta}(\tau) = n^{-1/2}(\hat{\mathbf{a}}^T, \mathbf{0}^T)^T$  with large probability, where  $\hat{\mathbf{a}} = \operatorname{argmin}\{V_{1n}(\mathbf{a})\}$ . Similarly to Huang et al. [5],  $V_{1n}$  can be written as

$$\begin{aligned} V_{1n} &= n^{-1/2}(\mathbf{a}^T, \mathbf{0}^T)^T \mathbf{S}_n\{\boldsymbol{\beta}_0(\tau), \tau\} + \frac{1}{2} \mathbf{a}^T \mathbf{H}_{11}\{\boldsymbol{\beta}_0, \tau\} \mathbf{a} + \mathbf{a}^T o_p(1) \mathbf{a} \\ &\quad + \lambda_n \sum_{k=1}^{K_1} c_k \left\{ \left( \sum_{j \in A_k \cap B_1} \frac{|\beta_{j,0}(\tau) + n^{-1/2} a_j|}{|\tilde{\beta}_j(\tau)|^\nu} \right)^\gamma - \left( \sum_{j \in A_k \cap B_1} \frac{|\beta_{j,0}(\tau)|}{|\tilde{\beta}_j(\tau)|^\nu} \right)^\gamma \right\} \\ &= T_{1n}(\mathbf{a}) + T_{2n}(\mathbf{a}). \end{aligned}$$

By Peng and Fine [4],  $n^{-1/2}(\mathbf{1}^T, \mathbf{0}^T)^T \mathbf{S}_n\{\boldsymbol{\beta}_0(\tau), \tau\}$  is asymptotically equal to  $n^{-1}(\mathbf{1}^T, \mathbf{0}^T)^T \sum_{i=1}^n \eta_i(\tau)$ , where  $\mathbf{1}$  is a  $b_1$ -dimensional vector and  $\mathbf{0}$  is a  $b_2$ -dimensional zero vector. Thus,  $T_{1n}(\mathbf{a})$  converges in distribution to  $\mathbf{a}^T N\{\mathbf{0}, \Sigma_{11}(\tau)\} + \mathbf{a}^T \mathbf{H}_{11}\{\boldsymbol{\beta}_0, \tau\} \mathbf{a} / 2$ . Similarly to Huang et al. [6], by (C9b) we have  $T_{2n}(\mathbf{a}) \rightarrow 0$ . Thus,  $V_{1n}$  converges in distribution to  $V_1(\mathbf{a})$ . By the argmin continuous mapping theorem of Kim and Pollard [7],  $\sqrt{n}(\hat{\boldsymbol{\beta}}_{B_1} - \boldsymbol{\beta}_{B_1,0})$  converges to  $\operatorname{argmin}\{V_1(\mathbf{a})\}$ . This completes the proof of Theorem 2.5.

## References

- [1] Ni A, Cai J, Zeng D. Variable selection for case-cohort studies with failure time outcome. *Biometrika* 2016; **103**:547–562.
- [2] Lin DY. On fitting cox's proportional hazards models to survey data. *Biometrika* 2000; **87**:37–47.
- [3] He P, Eriksson F, Scheike TH, Zhang MJ. A proportional hazards regression model for the sub-distribution with covariates-adjusted censoring weight for competing risks data. *Scandinavian Journal of Statistics* 2016; **43**:103122.
- [4] Peng L, Fine JP. Competing risks quantile regression. *Journal of the American Statistical Association* 2009; **104**:1440–1453.

- [5] Huang J, Li L, Liu Y, Zhao X. Group selection in the Cox model with a diverging number of covariates. *Statistica Sinica* 2014; **24**:1787–1810.
- [6] Huang J, Ma S, Xie H, Zhang CH. A group bridge approach for variable selection. *Biometrika* 2009; **96**:339–355.
- [7] Kim J, Pollard D. Cube root asymptotics. *Annals of Statistics* 1990; **18**:191–219.
